# Supplementary material
Source: publisher figshare collection journal article supplement (https://acs.figshare.com/ndownloader/files/24176865)
Supplement: Supplementary file 1 [file 24176865]

## Support Information

### Self-Healing Double-Crosslinked Supramolecular Binders of Polyacrylamide Grafted Soy Protein Isolate for Li-S Batteries

*Hui Wang<sup>a,d,‡</sup>, Yinyan Wang<sup>a,‡</sup>, Peitao Zheng<sup>c,e</sup>, Yu Yang<sup>b,c,\*</sup>, Yukun Chen<sup>d</sup>, Yuliang Cao<sup>e</sup>,  
Yonghong Deng<sup>c,\*</sup>, and Chaoyang Wang<sup>a,\*</sup>*

<sup>a</sup> Research Institute of Materials Science, South China University of Technology, 381 Wushan Road, Guangzhou, 510640, China.

<sup>b</sup> College of Materials and Energy, Guangdong Laboratory for Lingnan Modern Agriculture, South China Agricultural University, 483 Wushan Road, Guangzhou, 510642, China.

<sup>c</sup> Department of Materials Science & Engineering, Guangdong Provincial Key Laboratory of Energy Materials for Electric Power, 1088 Xueyuan Avenue, Southern University of Science and Technology, Shenzhen 518055, China

<sup>d</sup> Lab of Advanced Elastomer, South China University of Technology, 381 Wushan Road, Guangzhou 510640, China.

<sup>e</sup> College of Chemistry and Molecular Science, Hubei Key Laboratory of Electrochemical Power Sources and Sauvage Center for Molecular Sciences, 299 Bayi Road, Wuhan University, Wuhan 430072, China

<sup>‡</sup>These authors contributed equally.

\*Corresponding authors:

E-mail: zhywang@scut.edu.cn (CY Wang); yu.yang@scau.edu.cn (Y Yang);  
yhdeng08@163.com (YH Deng)

Number of pages: 5

Number of figures: 4

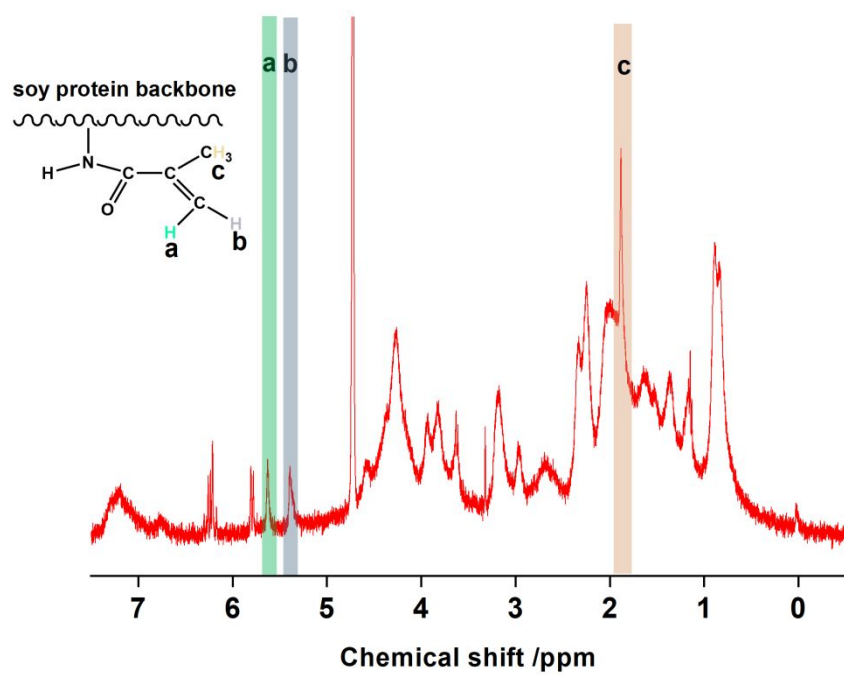

**Figure S1.**  $^1\text{H}$  NMR spectrum of methacrylic anhydride modified SPI in  $\text{D}_2\text{O}$ . The peaks at 1.9, 5.4 and 5.6 ppm confirm incorporation of acrylamide groups in the modified protein.

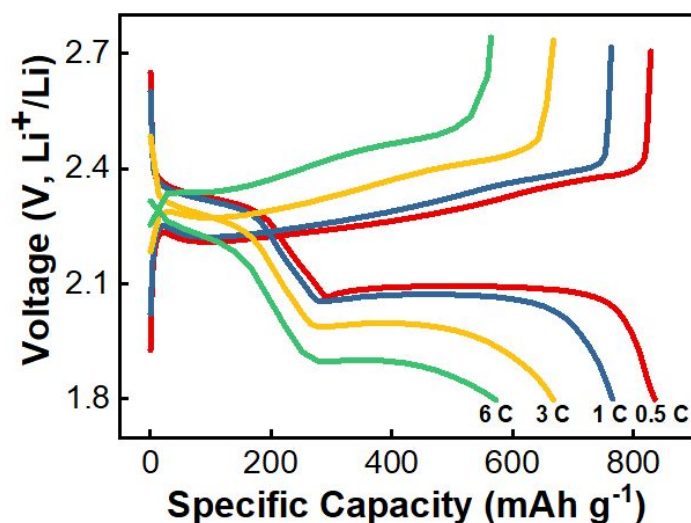

**Figure S2.** Galvanostatic charge/discharge profiles of SPI-PAM based electrode at different current rates of 0.5, 1, 3 and 6C within 1.8~2.7 V. The initial discharge curves show the typical two plateaus corresponding to the formation of long-chain polysulfides ( $\text{Li}_2\text{S}_x$ ,  $4 \leq x \leq 8$ ) at 2.32 V and short-chain polysulfides ( $\text{Li}_2\text{S}_x$ ,  $1 \leq x \leq 2$ ) at 2.1 V, respectively. When the current rate increases from 0.5 to 6.0 C, the galvanostatic discharge/charge curves keep the similar features, suggesting the good cycling stability under high rates.

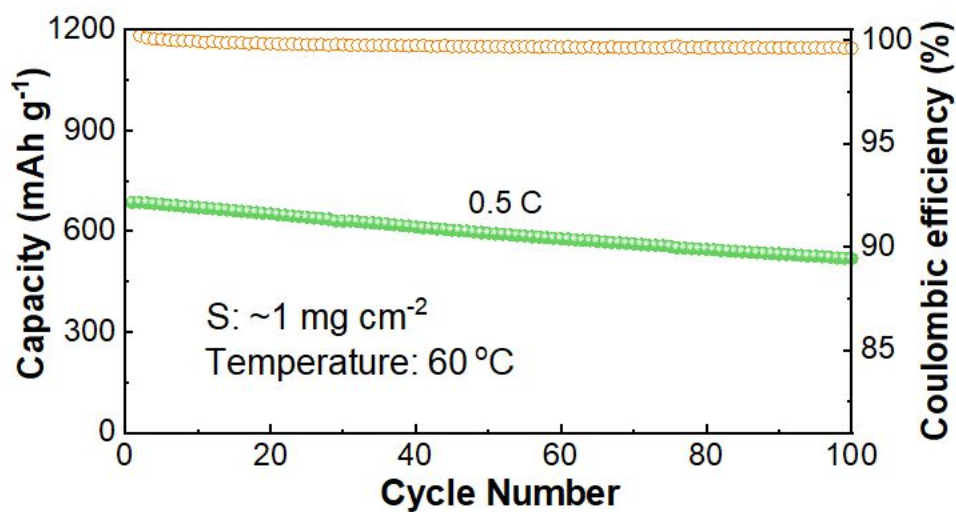

**Figure S3.** Cycling performance of the SPI-PAM based electrodes at a rate of 0.5 C; The test temperature is 60 °C. The SPI-PAM based sulfur cathode has a specific capacity of 685.4 mAh·g<sup>-1</sup> at 60 °C, and the capacity retention rate is 75.7% after 100 cycles (specific capacity is 518.7 mAh·g<sup>-1</sup>) with a high coulomb efficiency of 99.6%.

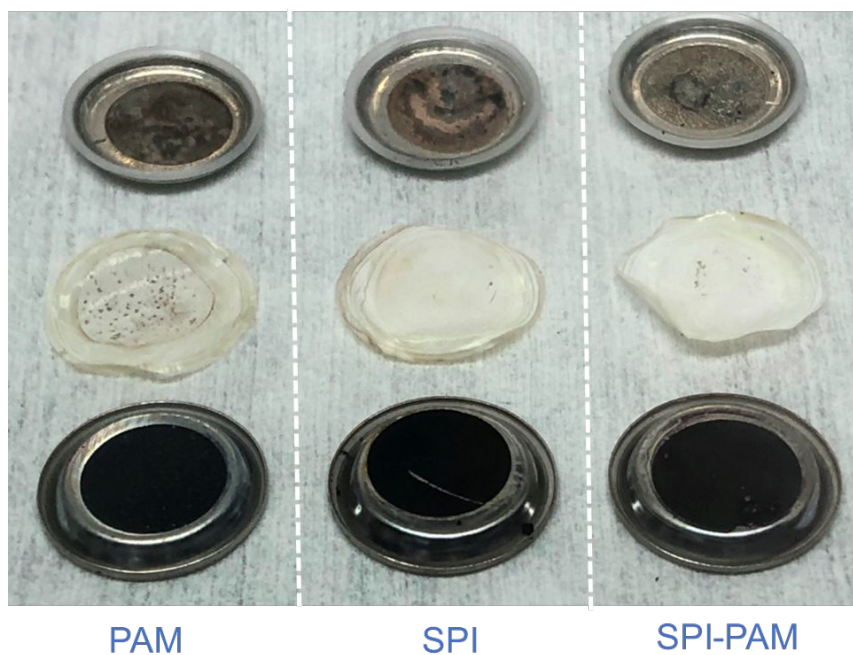

**Figure S4.** Photos of disassembled PAM, SPI, SPI-PAM binder based Li-S button cell after 300 cycles. The separators of SPI-PAM binder-based cell is clean and white with scarce polysulfide residue compared with PVDF and SPI based cells.
